# Supplementary material for: Description and Genomic Characterization of Oceaniferula flavus sp. nov., a Novel Potential Polysaccharide-Degrading Candidate of the Difficult-to-Cultivate Phylum Verrucomicrobiota Isolated from Seaweed
Source: MDPI journal article supplement (doi:10.3390/md21010031), 2022-12-29
Supplement: s1 [file s1]

## **Supplementary Material**

### **Description and Genomic Characterization of *Oceaniferula flavus* sp. nov., A Novel Potential Polysaccharide-Degrading Candidate of the Difficult-to-Cultivate Phylum Verrucomicrobiota Isolated from Seaweed**

Meng-Qi Ye<sup>1,2</sup>, Chuan-Bo Jin<sup>1</sup>, Xin-Jiang Liu<sup>1</sup>, Xin-Yun Tan<sup>1</sup>, Yu-Qi Ye<sup>1</sup>, and Zong-Jun Du<sup>1,2,3\*</sup>

<sup>1</sup>Marine College, Shandong University, Weihai, Shandong, 264209, PR China

<sup>2</sup>Weihai Research Institute of Industrial Technology of Shandong University, Weihai, 264209, China

<sup>3</sup>State Key Laboratory of Microbial Technology, Shandong University, Qingdao, Shandong, 266237, PR China

#### **\*Author for correspondence:**

Zong-Jun Du, Email: [duzongjun@sdu.edu.cn](mailto:duzongjun@sdu.edu.cn)

Tel and Fax: +86-631-5688303

**Supplementary Figure S1** Fast tree based on 16S rRNA gene sequences showing the phylogenetic position of strain 5K15<sup>T</sup> among closely related taxa. Bootstrap values (expressed as percentages of 1000 replications) of >70 % are shown at branch points. *Escherichia coli* JCM 1649<sup>T</sup> (AB242910) was used as an outgroup.

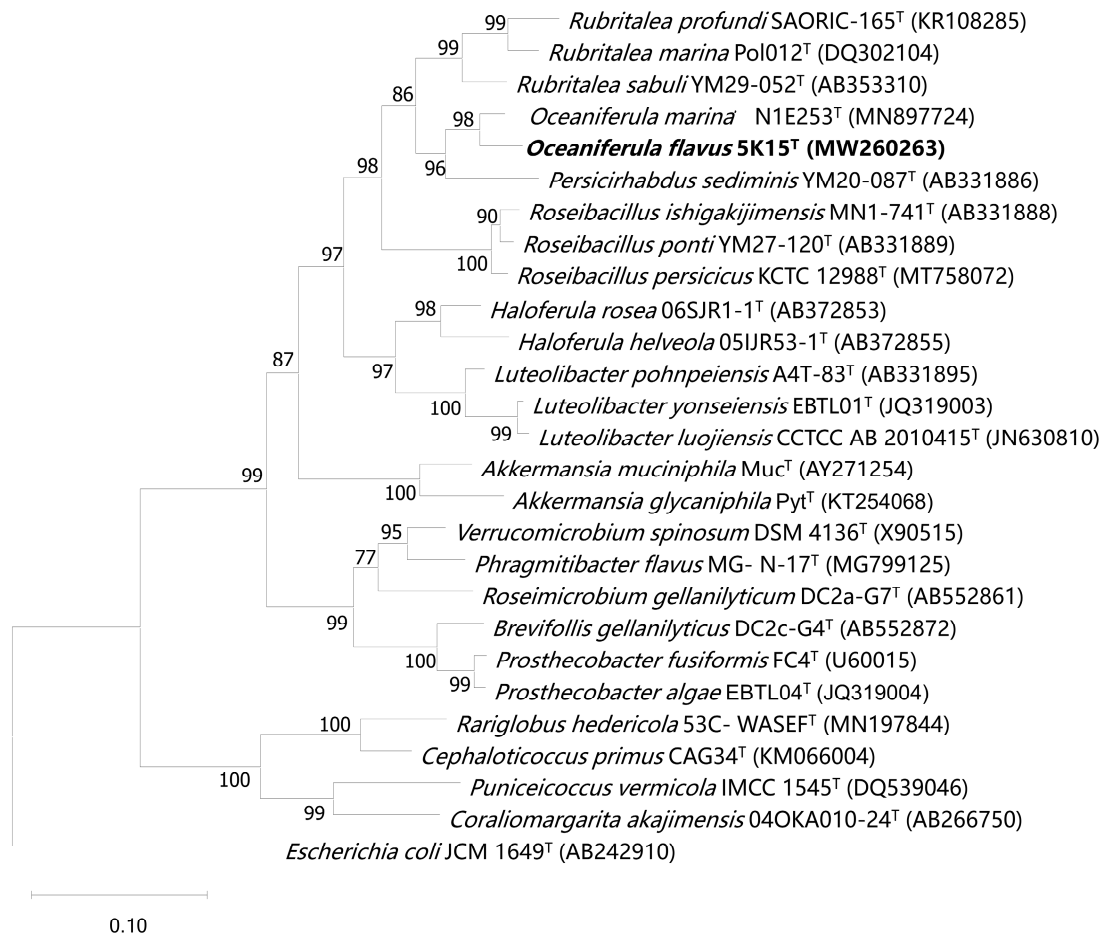

**Supplementary Figure S2** IQ tree based on 16S rRNA gene sequences showing the phylogenetic position of strain 5K15<sup>T</sup> among closely related taxa. Bootstrap values (expressed as percentages of 1000 replications) of >70 % are shown at branch points. *Escherichia coli* JCM 1649<sup>T</sup> (AB242910) was used as an outgroup.

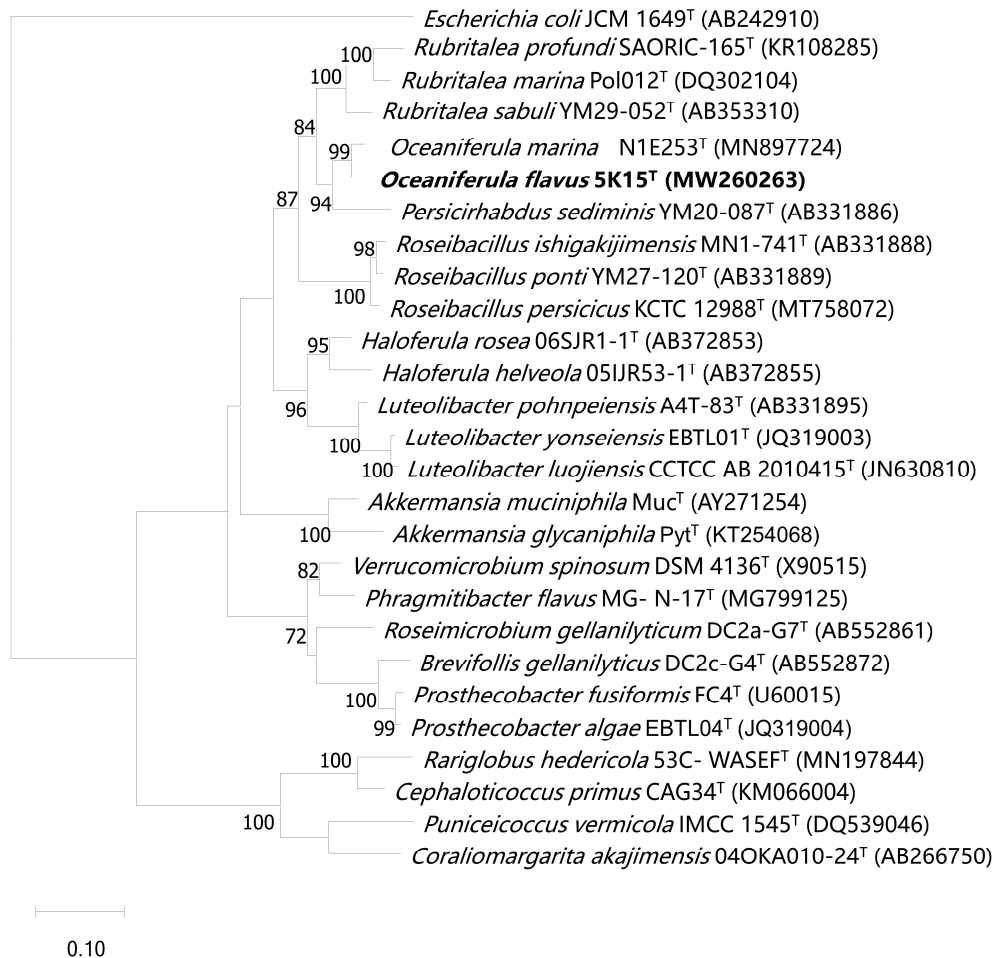

**Supplementary Figure S3** Scanning electron microscopy of cells of strain 5K15<sup>T</sup>.

Cells were grown on 1/2-strength R2A agar (BD) with 75 % artificial seawater at 33 °C for 3 days.

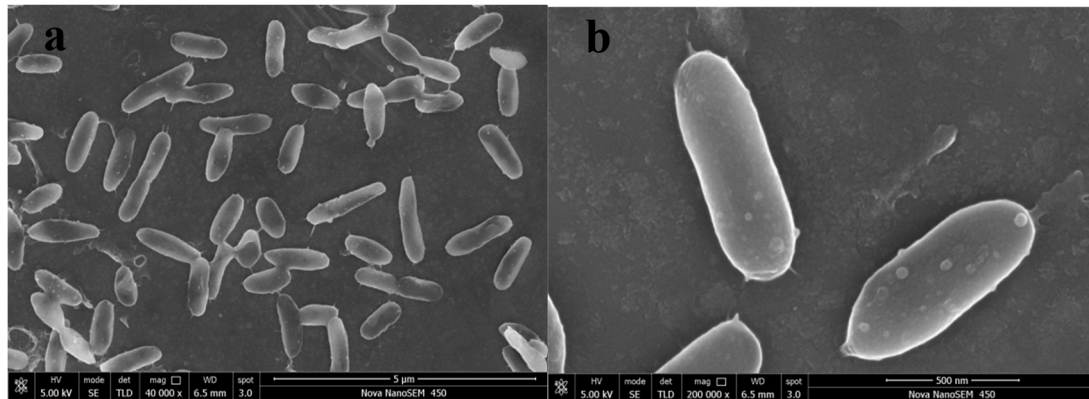

**Supplementary Figure S4** Two-dimensional TLC of the polar lipids of strain 5K15<sup>T</sup> and strain *O. marina* N1E253<sup>T</sup> (a, 5K15<sup>T</sup>; b, N1E253<sup>T</sup>) .

phosphatidylethanolamine(PE), diphosphatidylglycerol(DPG), unidentified phospholipid (PL), phosphatidylglycerol (PG), unidentified aminolipids (AL), unidentified GlycoLipid (GL), unidentified polar lipids (L1, L2, L3)

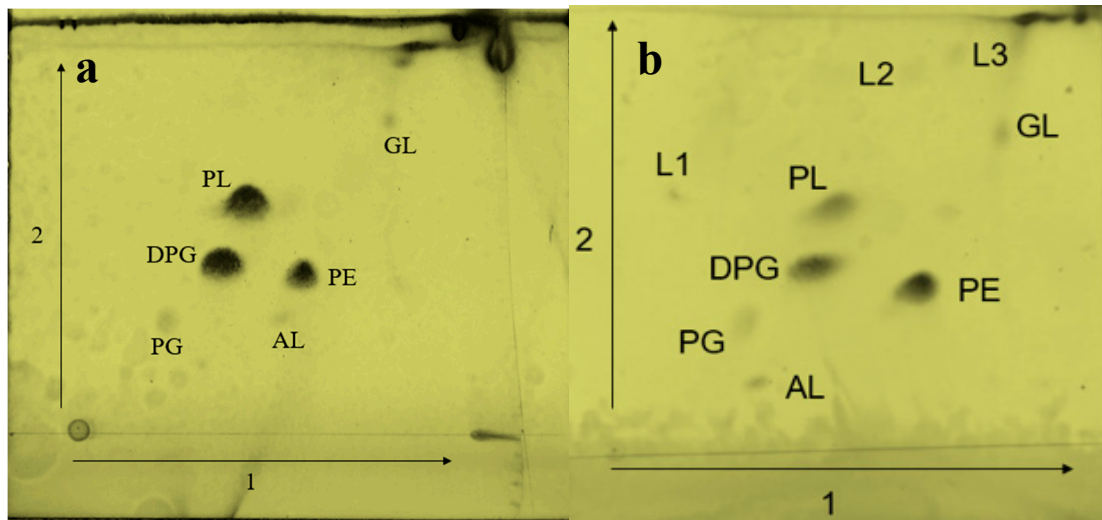

**Supplementary Figure S5** The cluster of orthologous (COG) classifications of strain 5K15<sup>T</sup> and strain *O. marina* N1E253<sup>T</sup>

The y-axis indicates presents the different functional categories. The x-axis indicates the number of unigenes in a specific functional cluster.

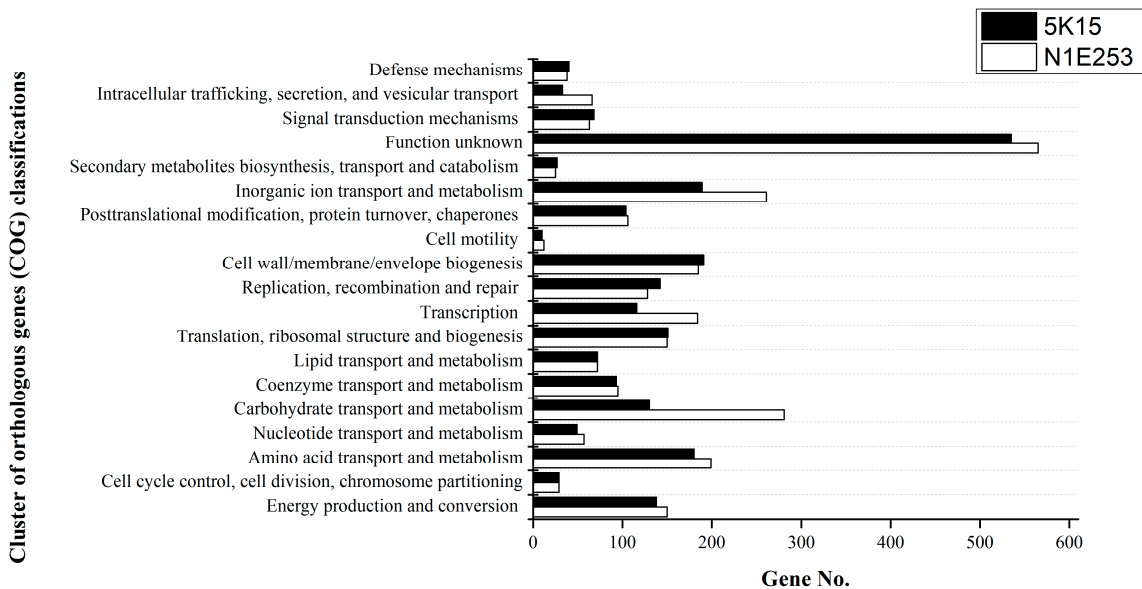

**Supplementary Table S1** Comparison of secondary metabolites predicted by antiSMASH.

| Cluster                              | Region | Type         | Location (bp)        | Total length (bp) | Gene Count |
|--------------------------------------|--------|--------------|----------------------|-------------------|------------|
| 5K15 <sup>T</sup>                    |        |              |                      |                   |            |
| 1                                    | 1.1    | Terpene      | 679,788 - 700,765    | 20,978            | 18         |
| 2                                    | 22.1   | Aryl polyene | 260,229 - 301,398    | 41,170            | 41         |
| 3                                    | 25.1   | Terpene      | 241,929 - 262,753    | 20,825            | 22         |
| 4                                    | 30.1   | T3PKS        | 1 - 36,965           | 36,965            | 29         |
| <i>O. marina</i> N1E253 <sup>T</sup> |        |              |                      |                   |            |
| 1                                    | 11.1   | Terpene      | 507,154 - 522,284    | 15,131            | 15         |
| 2                                    | 11.2   | Terpene      | 1,115,405- 1,136,226 | 20,822            | 12         |
| 3                                    | 22.1   | Phosphonate  | 342,728 - 379,214    | 36,487            | 35         |

T3PKS: Type III polyketide synthase cluster.
